# Supplementary material
Source: PubMed Central journal article supplement (PMC2719921)
Supplement: JCI35738sd.pdf [file JCI35738sd.pdf]

### **Supplemental Figure 1**

*LacZ* staining of representative tissue sections from DSCR-1-*lacZ*-Hprt mice. *LacZ* staining was performed on 10  $\mu\text{m}$  tissue sections from adult brain (*A*), heart (*B*), lung (*C*), kidney (*D*), liver (*E*), and thigh skeletal muscle (*F*). Bar = 100  $\mu\text{m}$ .

### **Supplemental Figure 2**

VEGF and LPS administration results in increased DSCR-1s promoter activity. *A and B*, Aorta (*A*) and brain (*B*) were harvested from either control (left), LPS-treated (middle), or VEGF-treated (right) mice. Each cryosection was immunostained with anti-*lacZ* antibody (green, upper column) or anti-PECAM-1 antibody (red, middle column). These were merged with DAPI (blue) (bottom column). White bar = 50  $\mu\text{m}$ . Arrowhead refers to co-localization of *lacZ* and PECAM-1 signals. *C and D*, Lung (*C*) and kidney (*D*) were harvested and stained for *lacZ* in parallel. Lower panel represents merged immunofluorescent images of *lacZ* (green), PECAM-1 (red) and DAPI (blue) obtained from VEGF-treated mice. Bar = 50  $\mu\text{m}$ .

### **Supplemental Figure 3**

DSCR-1 is expressed in the endothelium of VEGF-stimulated mice. 4 h following VEGF administration, heart (*A*) and kidney (*B*) were harvested and cyrosectioned. Immunohistochemical staining was performed using anti-DSCR-1 antibody (green, left) or anti-PECAM1 antibody (red, middle). These were merged with DAPI (blue) (right). Bar = 50  $\mu\text{m}$ .

### **Supplemental Figure 4**

VEGF and LPS administration results in stimulation in multiple organs. *A*, Mice were injected with PBS (-) or VEGF. 10 min later, the heart, lung, liver, spleen, and thigh skeletal muscle were harvested and lysed with RIPA buffer. Whole extracts were immunoprecipitated with anti-Flk-1 antibody. These samples were then immunoblotted with anti-phospho-specific Flk-1 antibody (upper column) or anti-Flk-1 antibody (bottom column). The data show the representative of two independent experiments. *B*, Mice were injected with PBS, VEGF, or LPS. 1 h later, organs were harvested and processed for total RNA. Quantitative real-time PCR was performed using a mouse *Egr-1*-specific primer pair. The results show the

means and the standard deviations of expression levels relative to cyclophilin A, from three independent experiments. \* P<0.001 compared with PBS treatment on each organ.

### **Supplemental Figure 5**

siRNAs against GATA2, NFATc1, NFATc2, and NFATc3 result in significant target inhibition in cultured human endothelial cells. Confluent HMVEC were transfected with siRNAs. Real-time PCR analysis using gene-specific primers for GATA-2 (*A*), NFATc1 (*B*), NFATc2 (*C*), or NFATc3 (*D*) was performed. The results show the means and the standard deviations of expression levels relative to cyclophilin A. \* P<0.001, \*\* P<0.01 compared with si-Control treatment plus VEGF on each experiment. *E*, Western blots were carried out using total cell lysates (50 µg) treated with either si-Control, si-NFATc1, si-NFATc2, or si-NFATc3. To normalize for loading, the membranes were stripped and re-probed with anti-β-actin antibody (bottom).

### **Supplemental Figure 6**

Systemically administered CsA or Ad-miGATA-2 inhibits inducible DSCR-1 promoter activity in *Hprt*-targeted mice. *A*, Mice received 1 mg/kg CsA i.p. every second day. After 14 days, mice were injected with VEGF. 4 h later, the diaphragm and chest wall were removed and stained for *lacZ*. *B*,  $1 \times 10^{10}$  pfu Ad-miControl or Ad-miGATA-2 were injected i.v. into DSCR-1-*lacZ*-*Hprt* mice. The mice received an identical dose of adenovirus on the following day. Three days later, the mice were injected with VEGF. At 4 h, the diaphragm and chest wall were harvested and *lacZ* stained. These results are representative of four (for CsA) and three (for Ad-miGATA-2) independent experiments.

### **Supplemental Figure 7**

Adenovirally expressed miRNA against mGATA-2 reduces GATA2 expression in cultured endothelial cells, aorta and lung. *A*, MS-1 cells were infected with either Ad-miControl or Ad-miGATA-2. Three days later, cell lysates were harvested and subjected to immunoblotting with anti-GATA-2 antibody. *B*, Aortas were harvested after administrated either Ad-miControl or Ad-miGATA-2 (as described in **Figure 7D**), cryosectioned and processed for immunostaining of GATA-2 (red, left and middle) and PECAM-1 (red, right). These images were merged with DAPI (blue). Arrow indicates the endothelial layer. Bar = 50µm. *C*, Following treatment with either Ad-miControl or Ad-miGATA2, the aorta and

lung were harvested and assayed for GATA2 expression by real-time PCR. The results show the means and the standard deviations of expression levels relative to cyclophilin A.

### **Supplemental Figure 8**

DSCR-1 overexpression in endothelium using the Flt-1 promoter. *A*, HMVEC or B16-F1 melanoma was infected adenovirus containing Flt1 promoter plus EGFP alone (Flt1-control) or EGFP and DSCR-1 (Flt1-DSCR-1) for 7 days. Cells were observed under the fluorescent field and bright field. Bar = 200 $\mu$ m. *B*, Total cell lysates derived from HMVEC (lanes 1 and 2) and B16-F1 (lanes 3 and 4) were subjected to immunoblotting using anti-DSCR-1 antibody.  $\beta$ -Actin antibody was used for loading internal control. *C*, Either 5x10<sup>9</sup> pfu of Ad-Flt1-control or Ad-Flt1-DSCR-1 was injected into C57BL6 mice. After 7 days, organs were removed for real-time PCR analysis with human specific DSCR-1 primer pairs. The results show the means and the standard deviations of expression levels relative to cyclophilin A. \* P<0.001 compared with expression level from Ad-Flt1-Control. *N.S.*, non-significant. *D*, Lungs were harvested after 10 days following the administration of Ad-Flt1-DSCR-1. Cryo-sections (10  $\mu$ m) were fixed and observed immuno-stained anti-EGFP (green), or anti-PECAM-1 (red) antibody, or DAPI (blue). Each image was merged and photographed under fluorescent microscopy. Bar = 50 $\mu$ m.

### **Supplemental Figure 9**

DSCR-1 modulates sepsis morbidity. *A*, mice were treated in the absence or presence of 16 mg/kg LPS for 20 h. Plasma samples were harvested and measured IL-6 level by ELISA. Data are expressed as means and the standard deviations, n=10. \* P<0.001, \*\* P<0.01, \*\*\* P<0.05 compared with WT or Ad-Flt1-control on each condition. *N.S.*, non-significant. *B*, mice were treated without or with LPS for 24 h. Heart rate and blood pressure were measured. The results show the means and the standard errors of the mean, n=6 (# n=3, due to the mice death or under the detection limit). \* P<0.001, \*\* P<0.05 compared with WT or Ad-Flt1-control on each condition. *C*, WT (black), DSCR-1<sup>-/-</sup> (DSCR-1 KO (green)), or mice administrated Ad-Flt1-control (red) or DSCR-1s (blue) were treated 16 mg/kg LPS. Following 0, 2, 4, 6, 13 (WT and DSCR-1<sup>-/-</sup>), 20, and 24 (Ad-Flt1-control and Ad-Flt1-DSCR-1s) h time points, mice body temperature was measured. Data was expressed as means and the standard deviations, n=8, except for DSCR-1<sup>-/-</sup> as n=6.

Supplemental\_Fig. 1

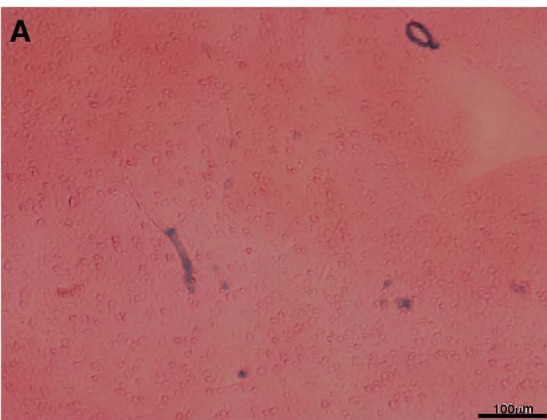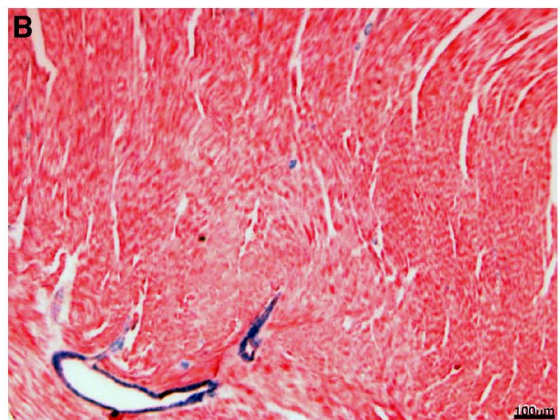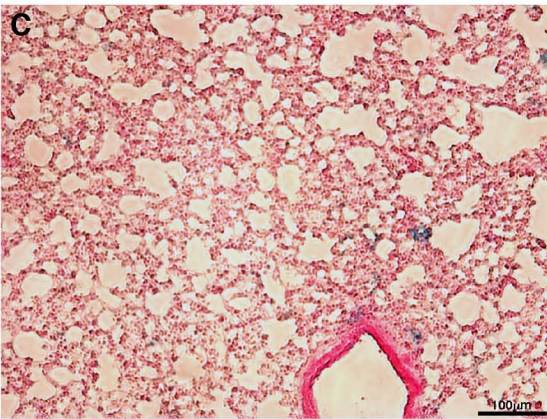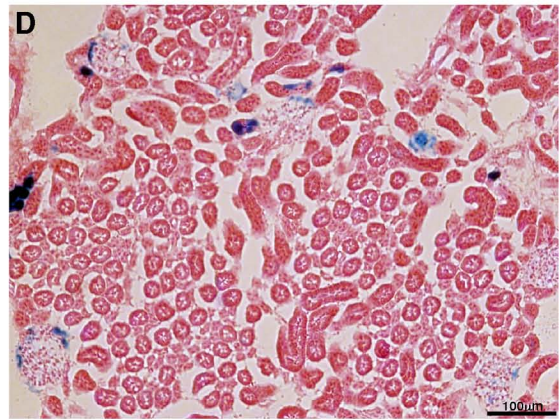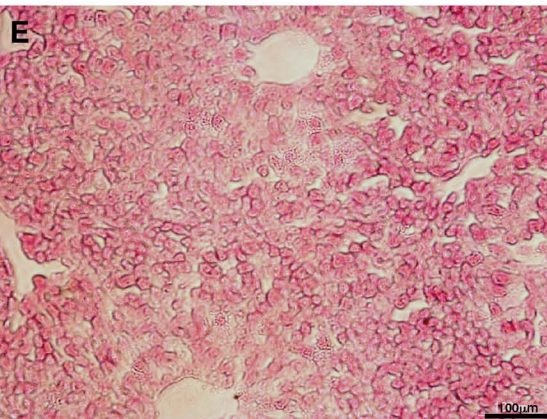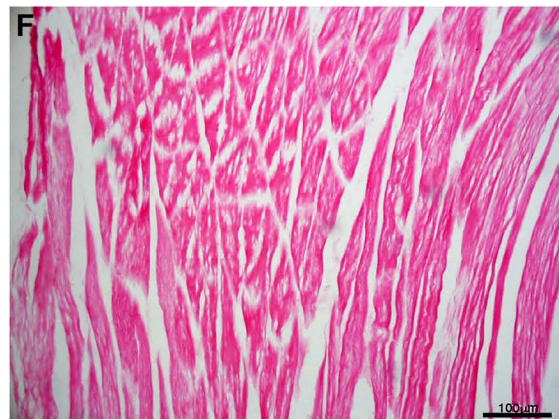

Control

LPS treatment

VEGF treatment

*LacZ*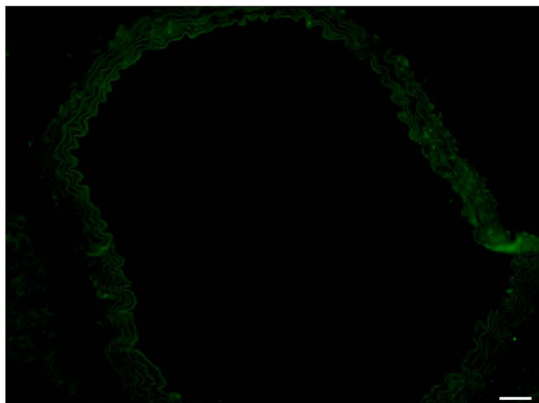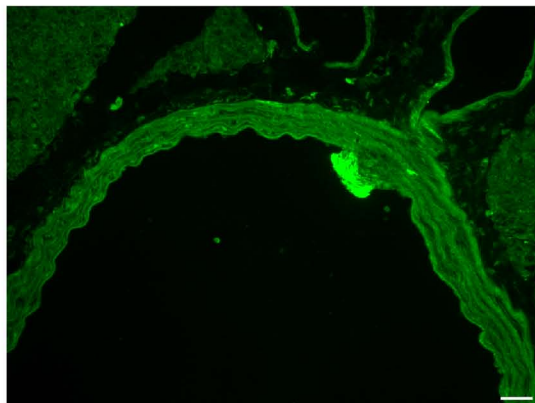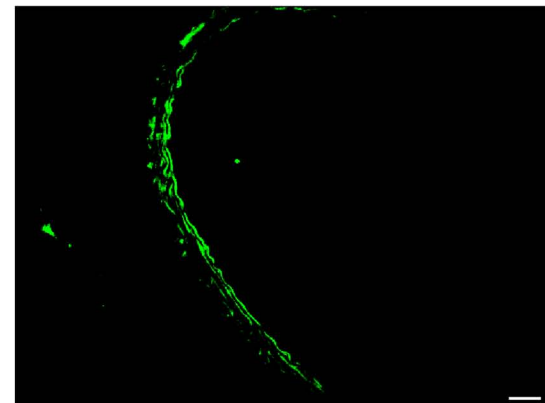

PECAM-1

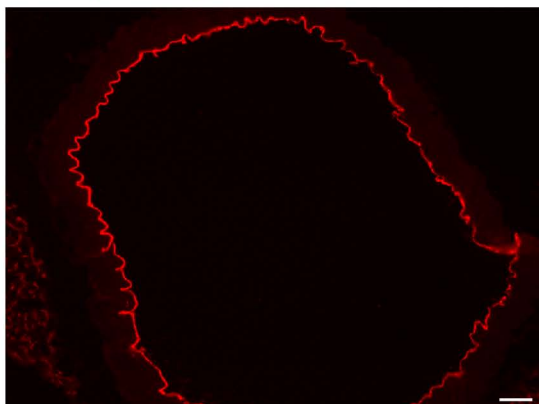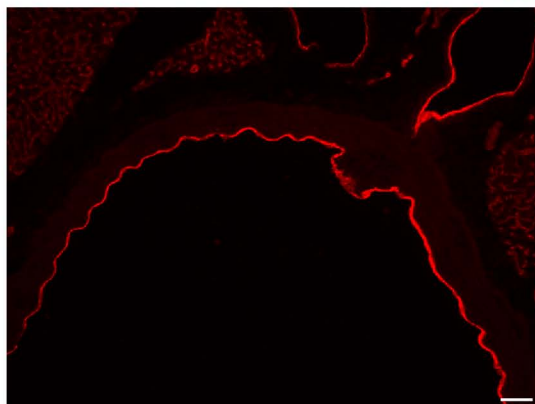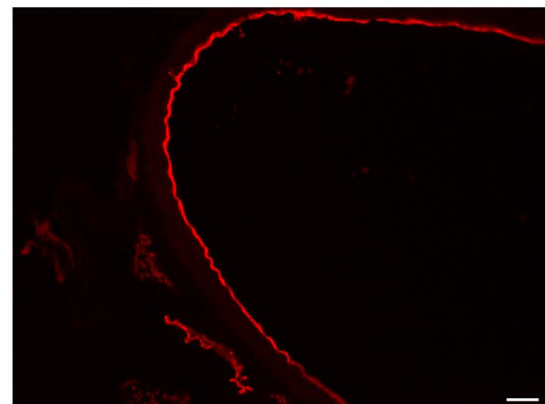

Merge

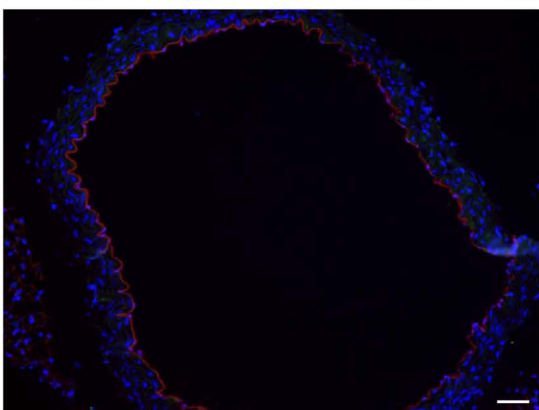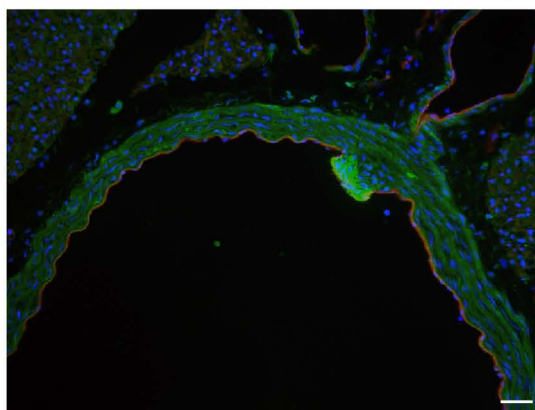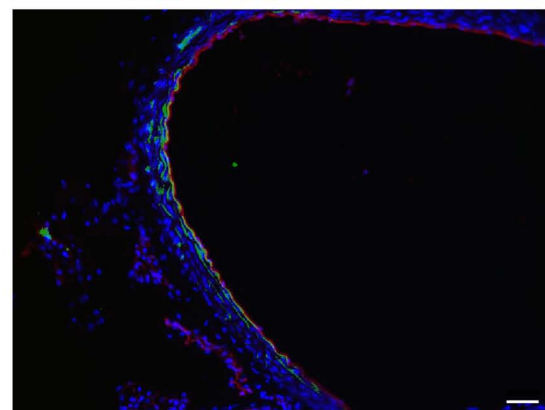

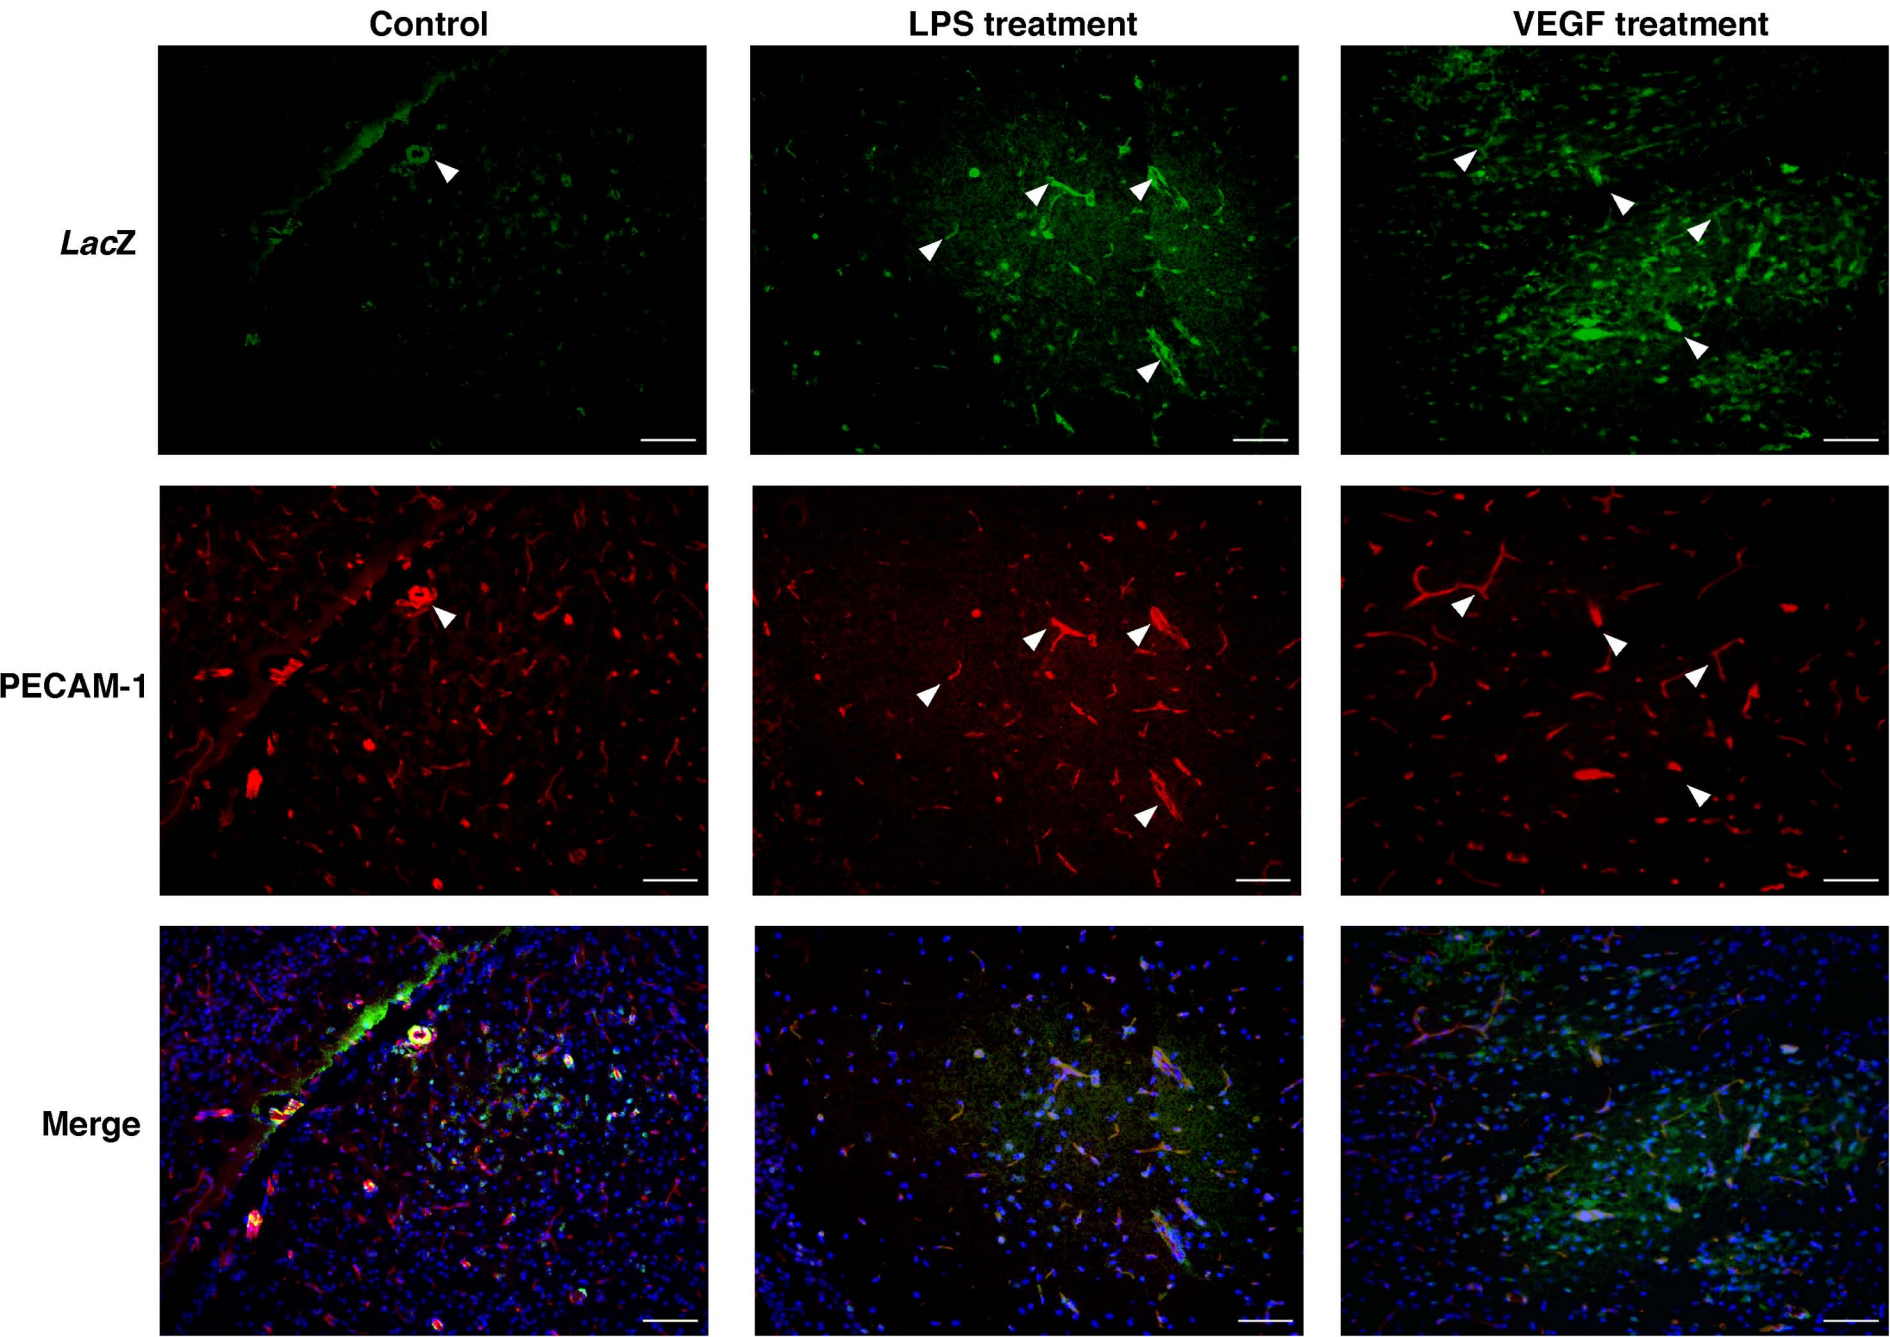

Control

LPS treatment

VEGF treatment

*LacZ*

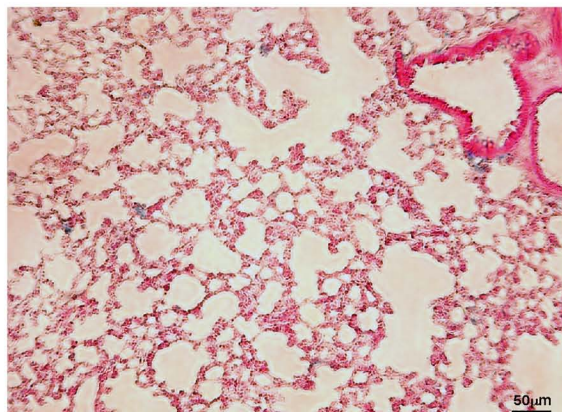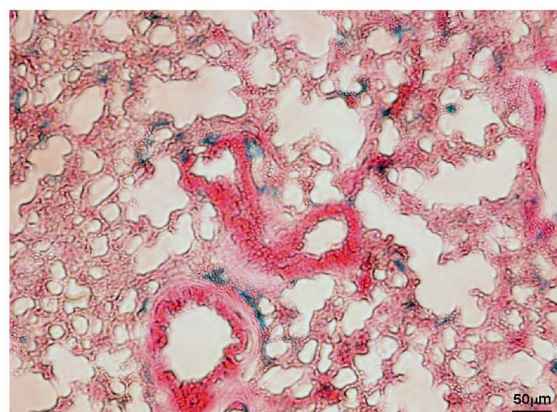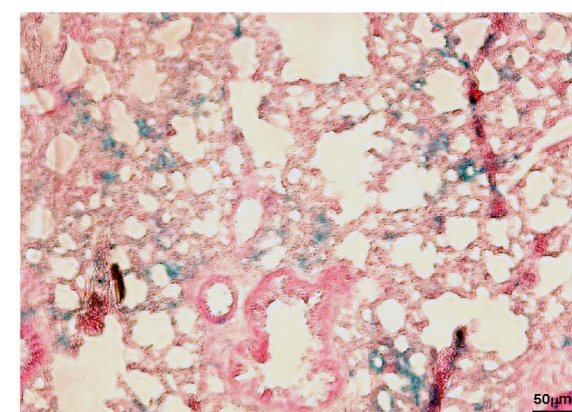

VEGF treatment

Merge  
(*LacZ*/PECAM-1/DAPI)

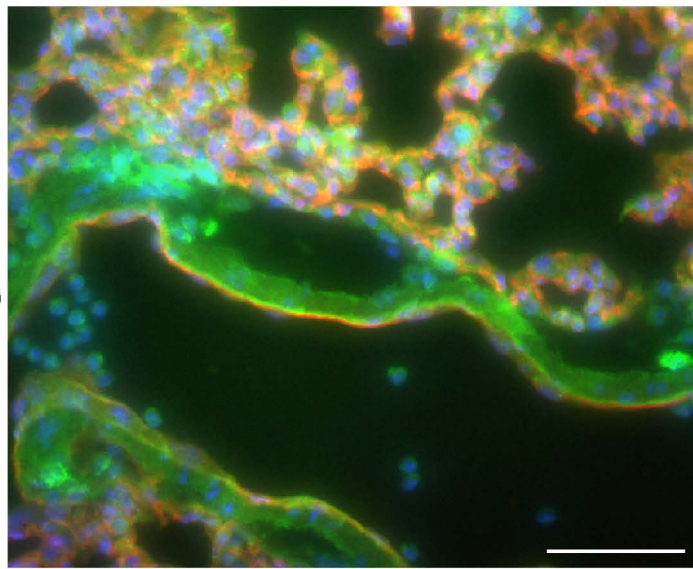

*LacZ*: green  
PECAM-1: red  
DAPI: blue

Control

LPS treatment

VEGF treatment

*LacZ*

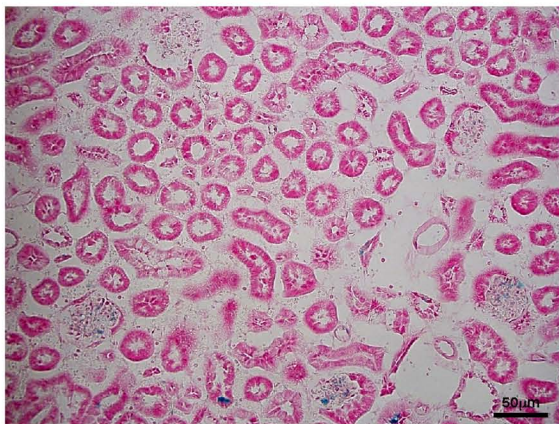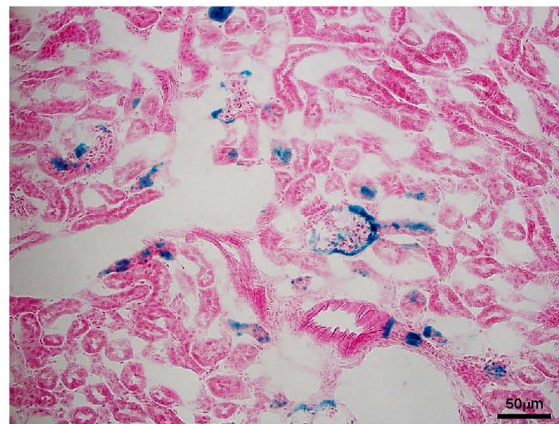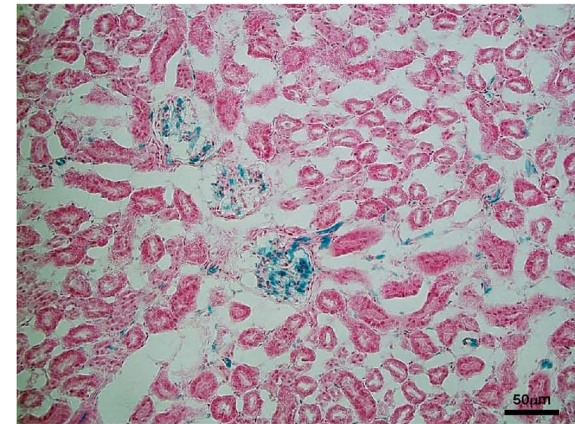

VEGF treatment

Merge  
(*LacZ*/PECAM-1/DAPI)

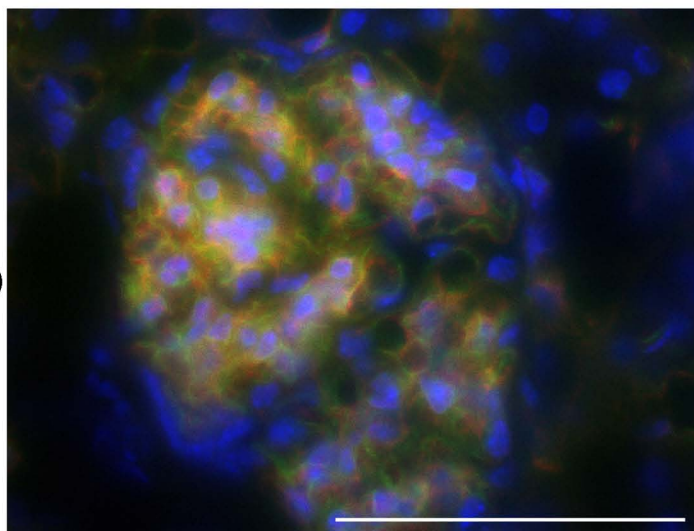

*LacZ*: green  
PECAM-1: red  
DAPI: blue



A

DSCR-1

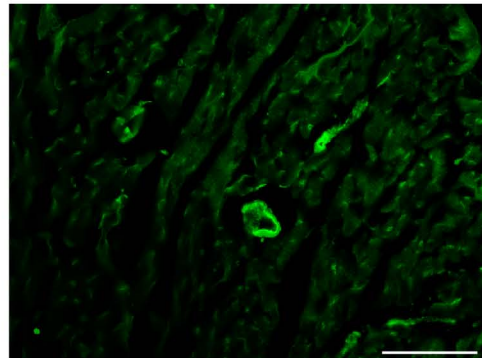

PECAM-1

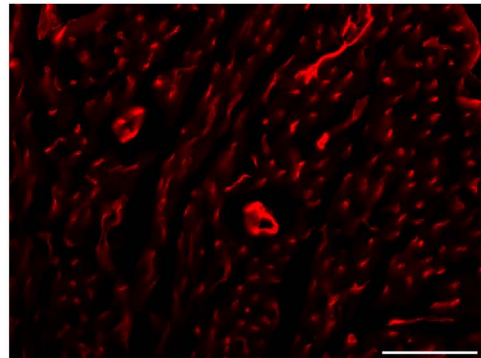

Merge (DSCR-1/PECAM-1/DAPI)

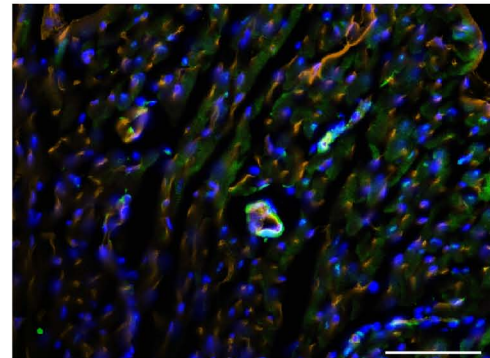

B

DSCR-1

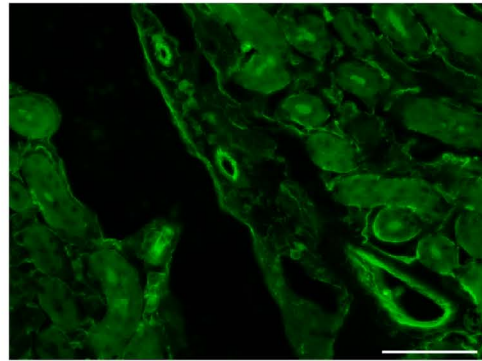

PECAM-1

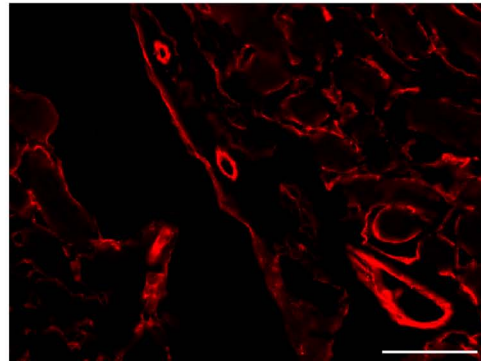

Merge (DSCR-1/PECAM-1/DAPI)

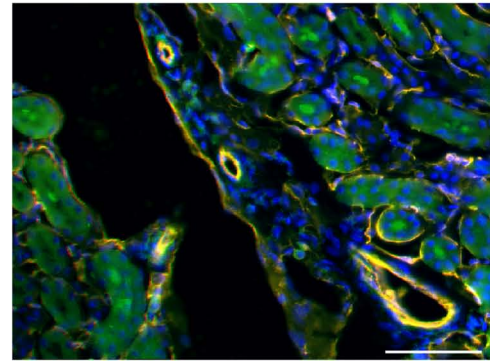

A

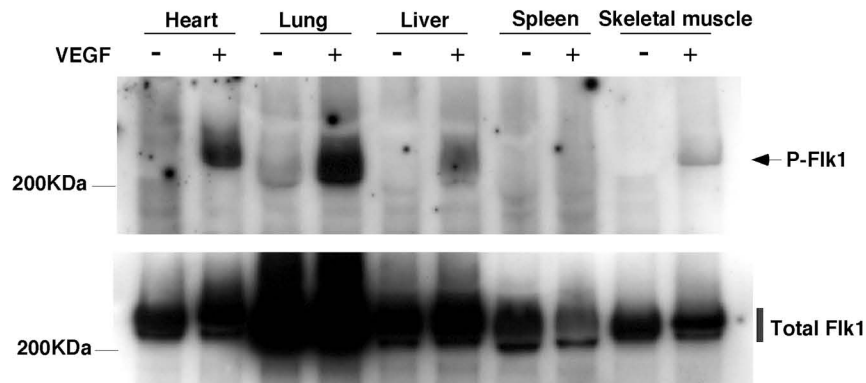

B

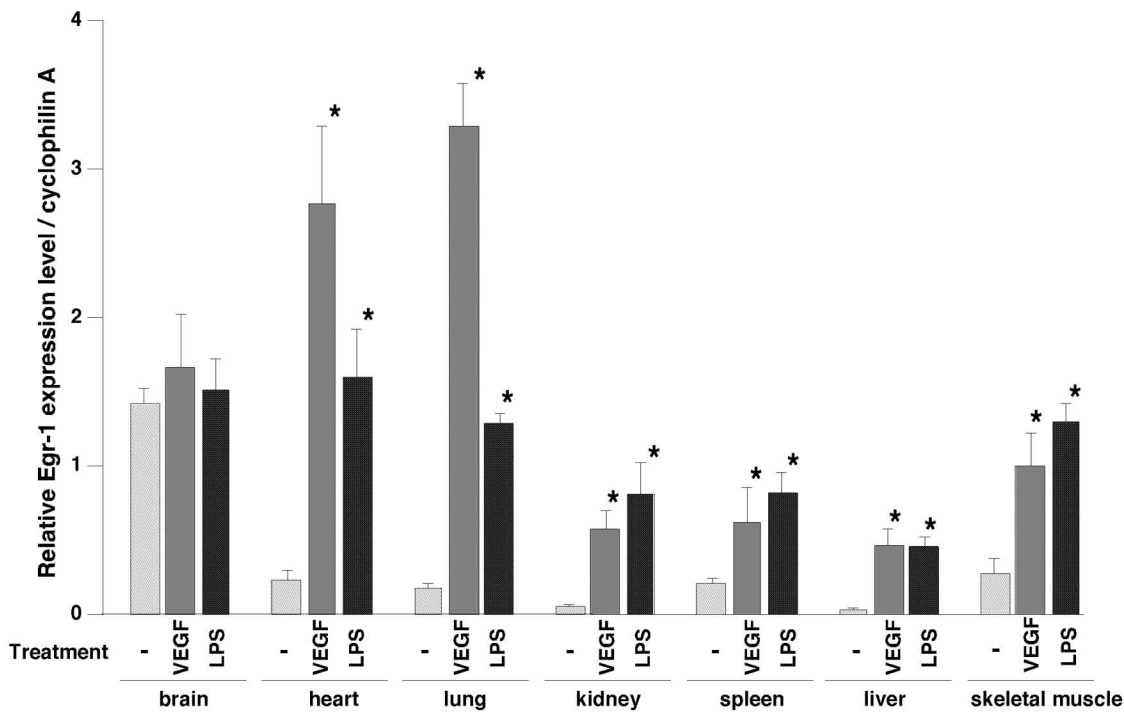

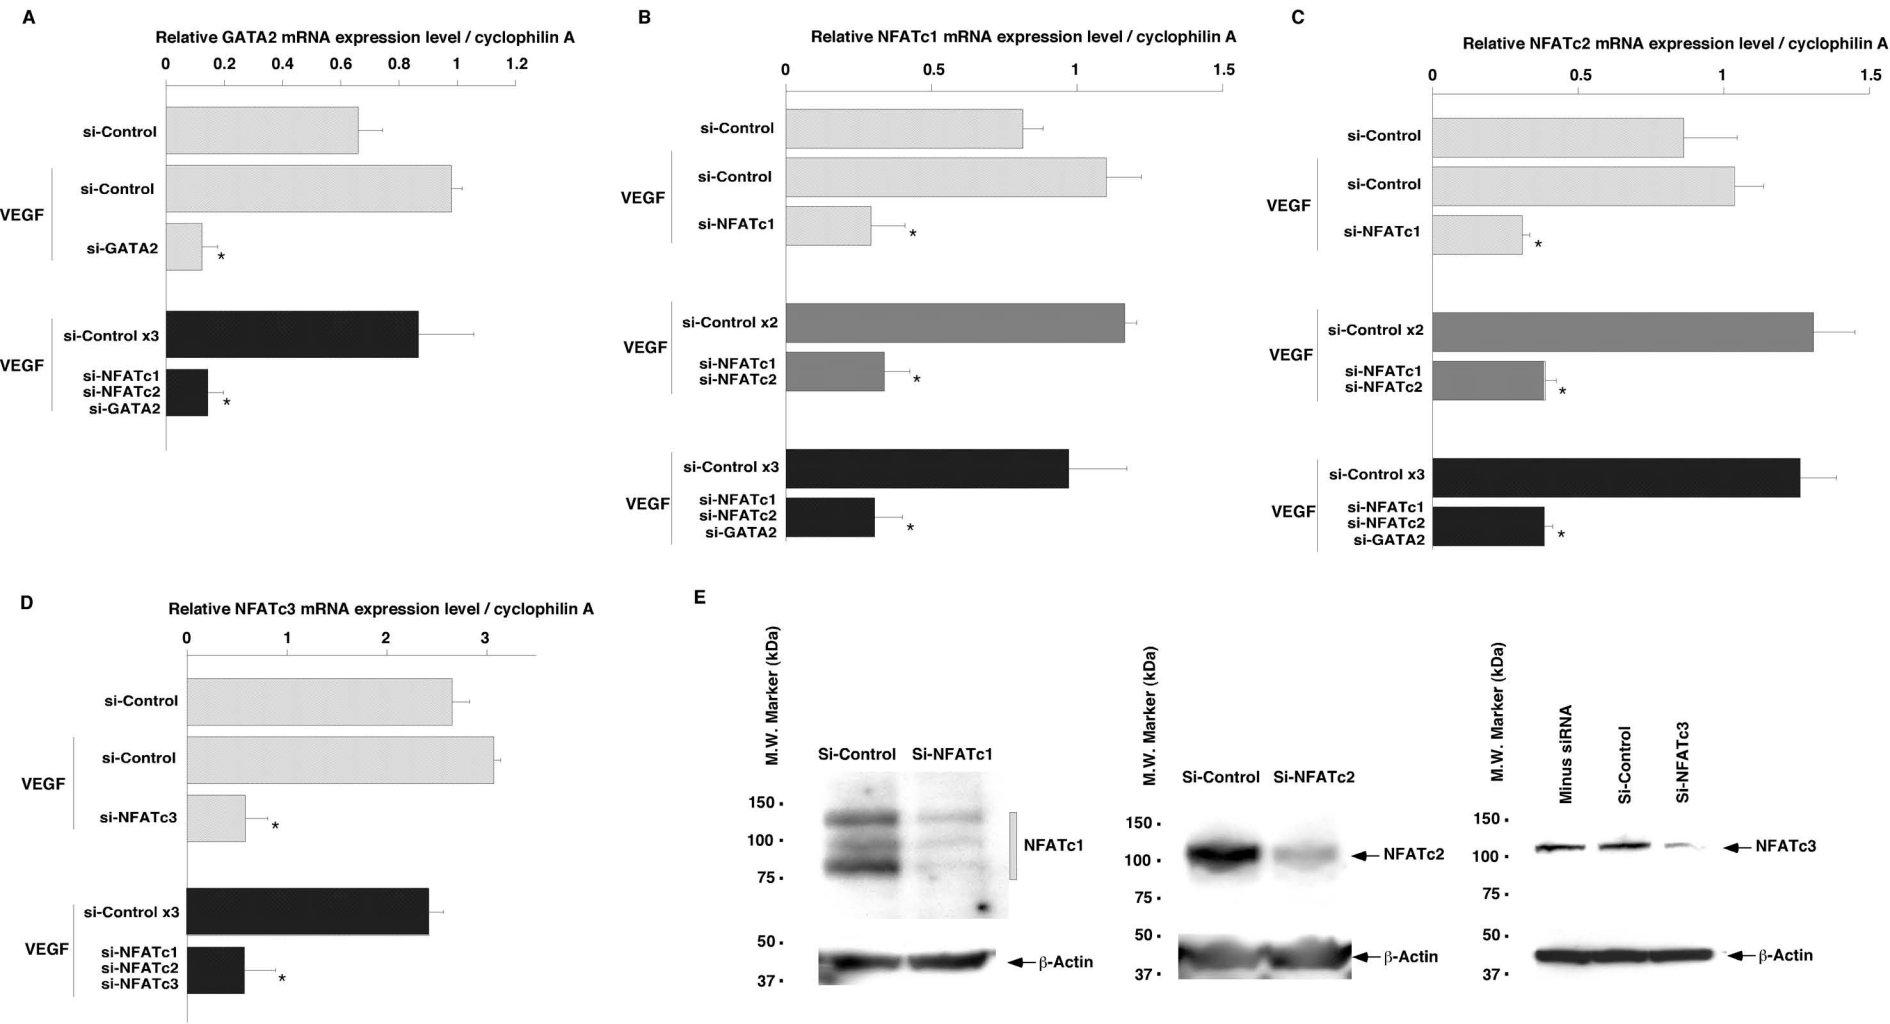

A

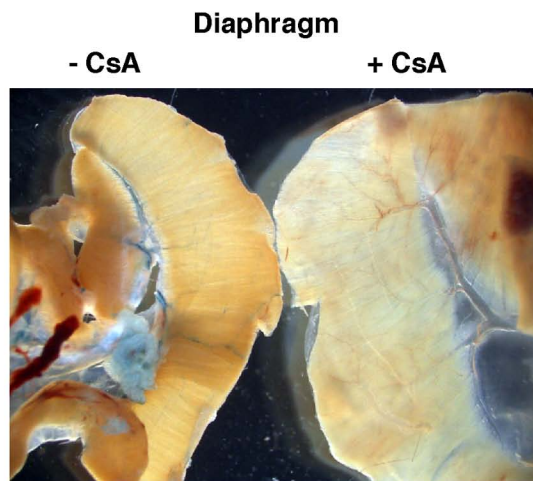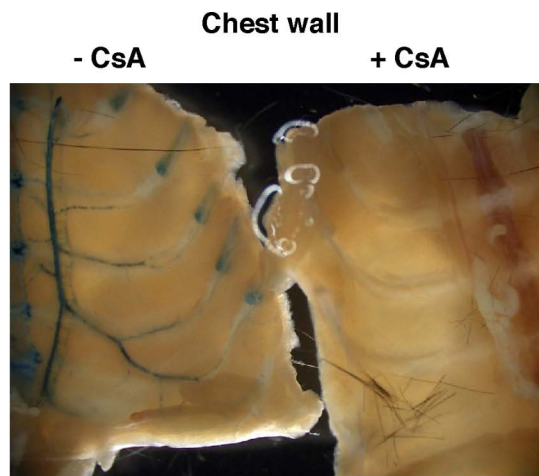

B

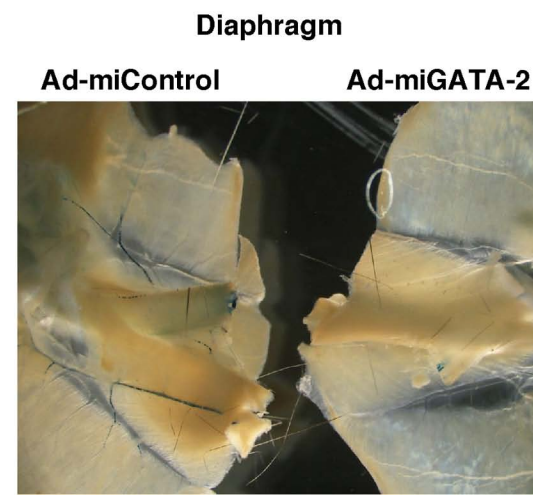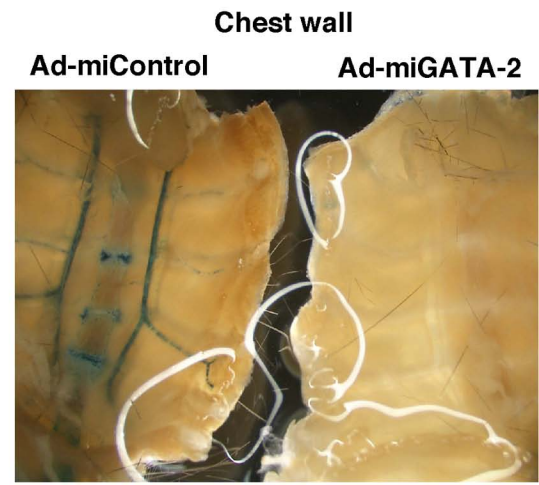

A

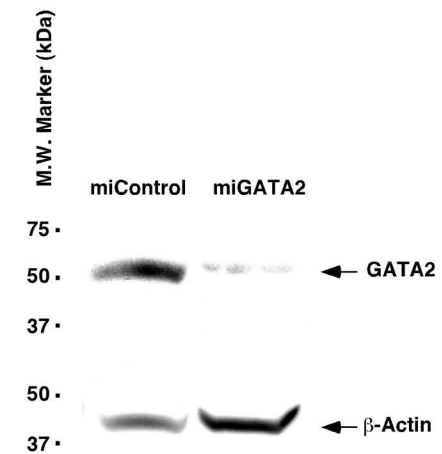

B

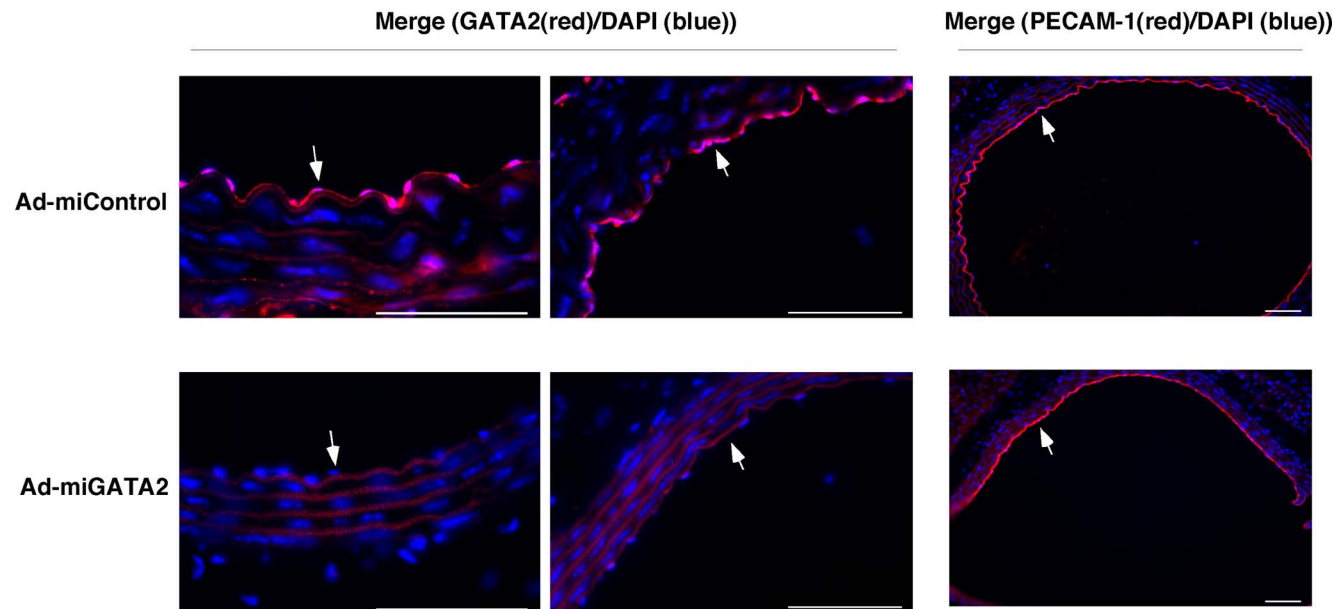

C

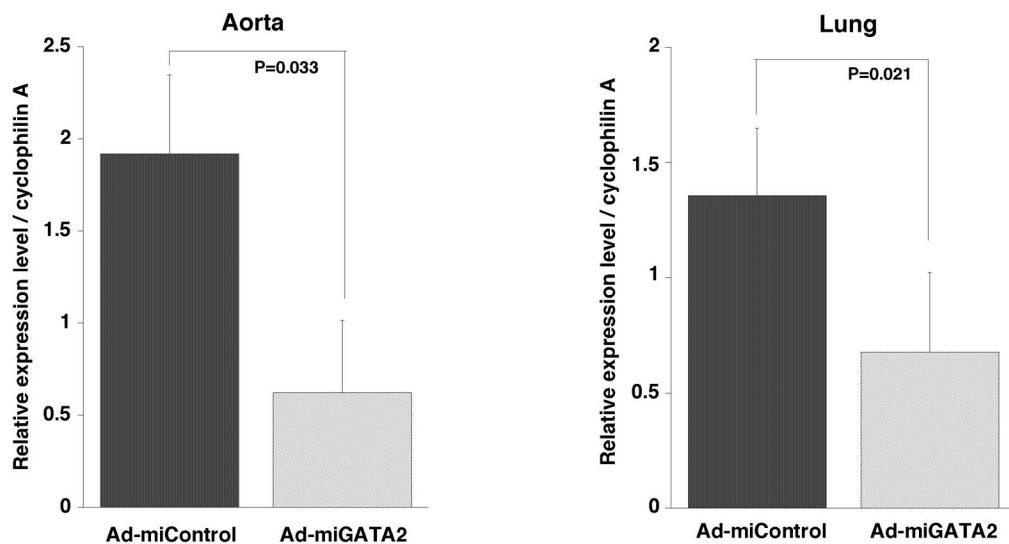

A

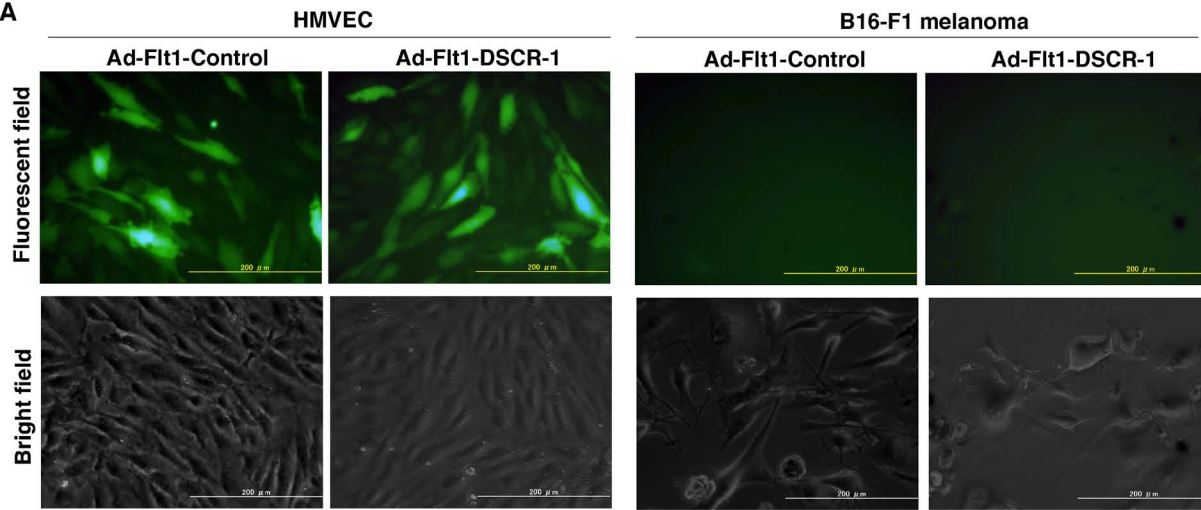

B

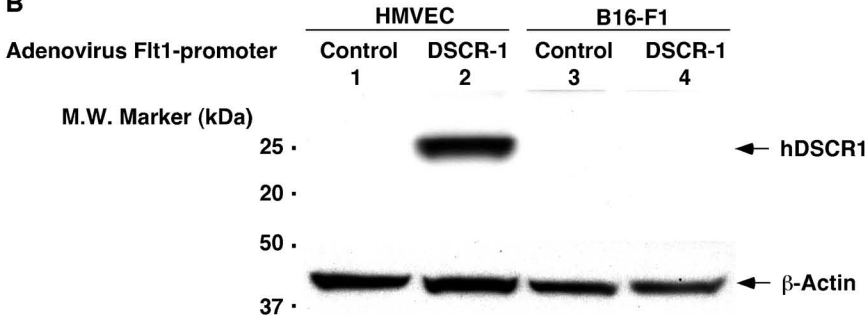

C

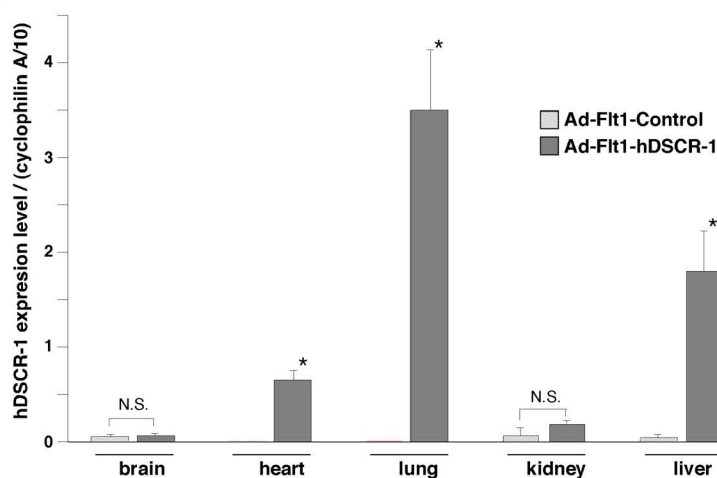

D

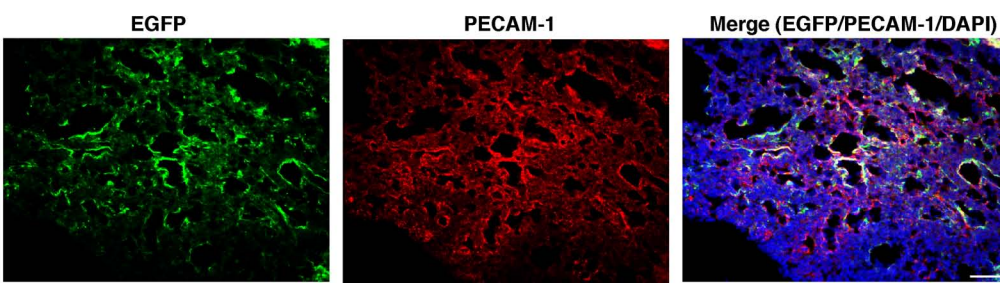

**A**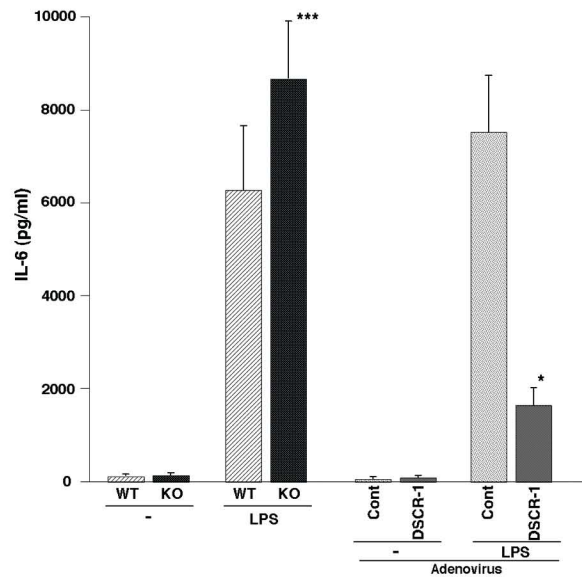**B**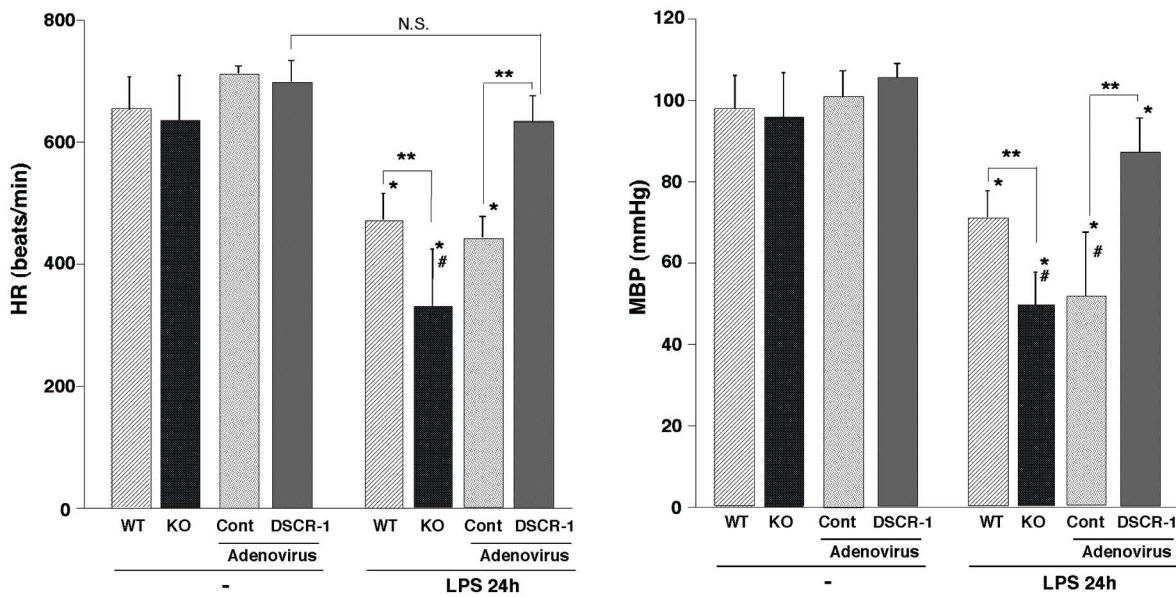**C**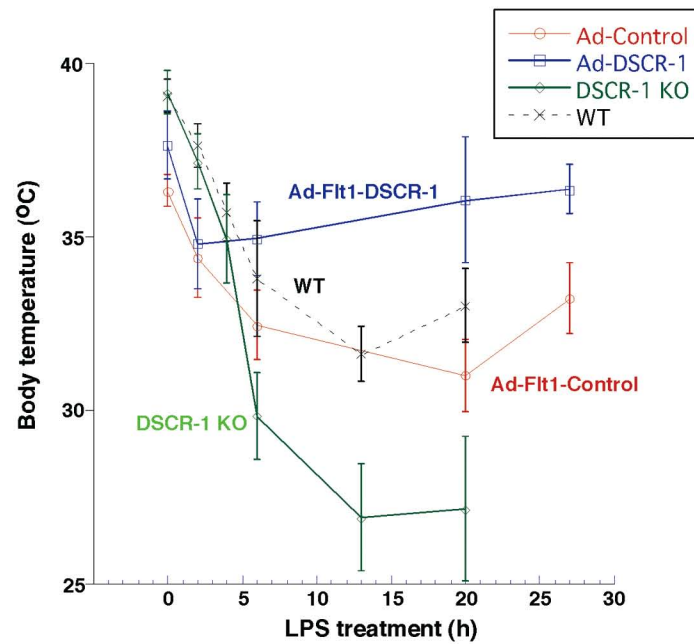

## Real-time primers

### mDSCR-1 L

Forward GAG ATG GAG GAG GTG GAT CTG

Reverse TCA TAT GTT CTG AAG AGG GAT TCA

### mDSCR-1s

Forward GCA GAA TGC ATT TTA GGG ACT TTA

Reverse TAA AAT ACT GGA AGG TGG TGT CCT

### mGATA-2

Forward TAC CAC AAG ATG AAT GGA CAG AAC

Reverse ACA TTG TGC AGC TTG TAG TAG AGG

### hGATA-2

used Hs\_GATA2\_1\_SG QuantiTect Primer Assay  
( QT00045381 ) (Qiagen)

### hNFATc1

Forward GCA TGG CTA CTT GGA GAA TGA G

Reverse AGT TCA ATG TCG GAG TTT CTG AGT

### hNFATc2

Forward TTT ACT GAG AAG ACC ACA GAT GGA

Reverse GTA GGT AAA GTG CTG AGG CTG ACT

### hNFATc3

Forward AAG CCA AGA GAT AAT AAT TGC CAG

Reverse TAT ATC TGA ATT GCG GAG TTT CAA

### hDSCR-1s

Forward ATC TCT TAT ATG CCA TCT CCA AGC

Reverse TGG ATA ATT TTT GGC TTA GGT CTC

### hCyclophilin A

Forward TGG TTC CCA GTT TTT CAT CTG C

Reverse CCA TGG CCT CCA CAA TAT TCA

### mCyclophilin A

Forward CAA AGA CAC CAA TGG CTC ACA G

Reverse CCA CAT CCA TGC CCT CTA GAA



mEgr1

Forward GCC TCG TGA GCA TGA CCA AT  
Reverse GCA GAG GAA GAC GAT GAA GCA

mVCAM-1

Forward GAA CCC AAA CAG AGG CAG AGT G  
Reverse GGA CTG CCC TCC TCT AGT ATA GGA

mE-selectin

Forward TTG AGT GCA CAT CTC AGG GAA A  
Reverse GAC GTC AAG GCT TGG ACA TTG

mICAM-1

Forward GGT GAC TGA GGA GTT CGA CAG AA  
Reverse TCT GCG TCT CCA GGA TCT GG

*lacZ*

Forward ACG CGC GAA TTG AAT TAT GG  
Reverse GTT GAC TGT AGC GGC TGA TGT T

**for knock down oligomers**

SiRNA target sequences

hGATA2 Forward UUC UUG GAC UUG UUG GAC AUC UUC C  
Reverse GGA AGA UGU CCA ACA AGU CCA AGA A

hNFATc1 Forward UUC CGG CAC AGU CAA UGA CGG CUC G  
Reverse CGA GCC GUC AUU GAC UGU GCC GGA A

hNFATc2 Forward UUU CUC UUC CCA UUG AUG ACG UAG A  
Reverse UCU ACG UCA UCA AUG GGA AGA GAA A

hNFATc3 Forward GCU GCC UCU AGU CAA GAA UUU GAU U  
Reverse AAU CAA AUU CUU GAC UAG AGG CAG C

miRNA target sequence

mGATA2 Forward TGC TGA AGA GAT GGG AGC CCG AGT GGG TTT TGG CCA  
CTG ACT GAC CCA CTC GGT CCC ATC TCT T

Reverse CCT GAA GAG ATG GGA CCG AGT GGG TCA GTC AGT GGC  
CAA AAC CCA CTC GGG CTC CCA TCT CTT C
